# Supplementary material
Source: bioRxiv or medRxiv preprint supplement (https://www.biorxiv.org/highwire/filestream/105049/field_highwire_adjunct_files/2/345082-3.pdf)
Supplement: Supplementary file [file 345082-3.pdf]

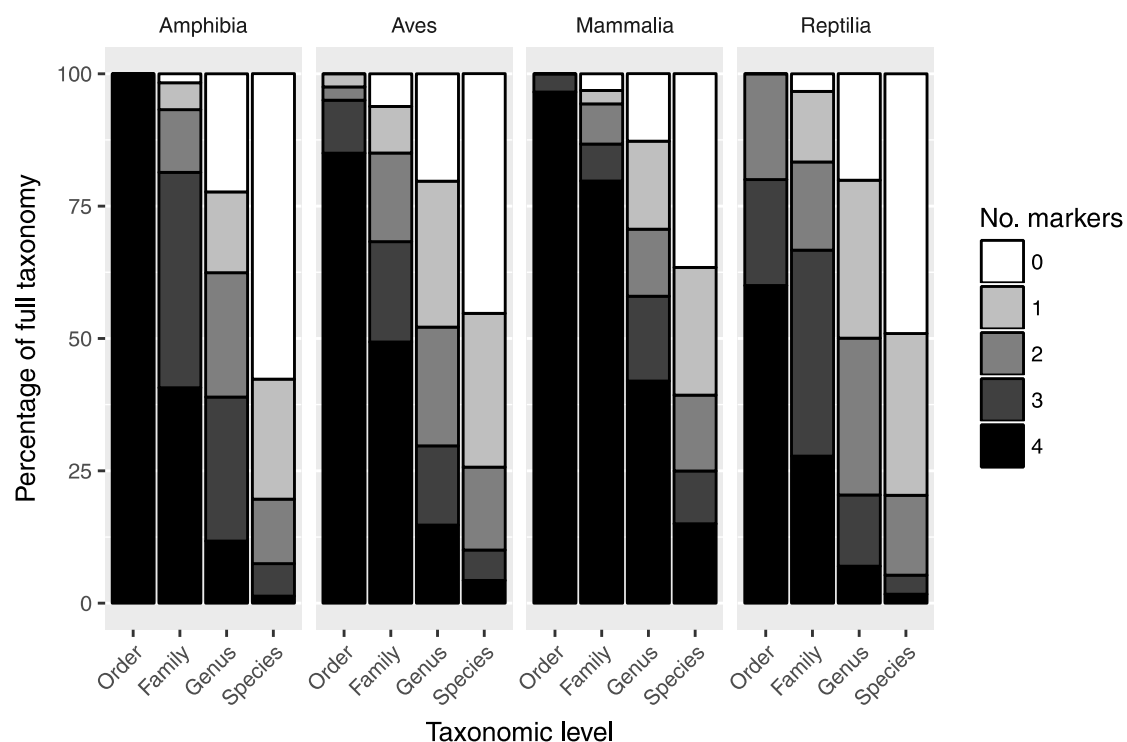

**Supplement figure 1:** The percentage of taxa at each taxonomic level represented in the database by 0, 1, 2, 3 or 4 loci for each class of Tetrapoda. In all cases most species have either no reference sequences or only one marker is available. Representation improves at higher taxonomic levels but only Amphibian orders are fully covered by all four markers (3 orders).
